# Supplementary material for: The interaction between self-care behavior and disease knowledge on the decline in renal function in chronic kidney disease
Source: PubMed Central journal article supplement (PMC7801646; doi:10.1038/s41598-020-79873-z), 2021-01-11
Supplement: 41598_2020_79873_MOESM1_ESM.pdf [file 41598_2020_79873_MOESM1_ESM.pdf]

**The interaction between self-care behavior and disease knowledge on the decline  
in renal function in chronic kidney disease**

Yi-Chun Tsai<sup>1-5#</sup>, Shu-Li Wang<sup>6#</sup>, Hui-Ju Tsai<sup>7</sup>, Tzu-Hui Chen<sup>6</sup>, Lan-Fang Kung<sup>6</sup>, Pei-Ni Hsiao<sup>6</sup>, Shih-Ming Hsiao<sup>6</sup>, Shang-Jyh Hwang<sup>1,3,4</sup>, Hung-Chun Chen<sup>1,3,4</sup>, Yi-Wen Chiu<sup>1,3,4\*</sup>

<sup>1</sup>Department of Nephrology, Department of Internal Medicine, Kaohsiung Medical University Hospital, Kaohsiung Medical University, Kaohsiung, Taiwan

<sup>2</sup>Division of General Medicine, Department of Internal Medicine, Kaohsiung Medical University Hospital, Kaohsiung Medical University, Kaohsiung, Taiwan

<sup>3</sup>Faculty of Renal Care, Kaohsiung Medical University, Kaohsiung, Taiwan

<sup>4</sup>School of Medicine, College of Medicine, Kaohsiung Medical University, Kaohsiung, Taiwan

<sup>5</sup>Cohort Research Center, Kaohsiung Medical University, Kaohsiung, Taiwan.

<sup>6</sup>Department of Nursing, Kaohsiung Medical University Hospital, Kaohsiung Medical University

<sup>7</sup>Department of Family Medicine, Kaohsiung Municipal Ta-Tung Hospital, Kaohsiung Medical University Hospital, Kaohsiung Medical University, Kaohsiung, Taiwan

**Table S1.** The risk for rapid eGFR decline (eGFR decline more than 3ml/min/1.73m<sup>2</sup>/year) within one year prior to questionnaire examination in study patients in univariate logistic analysis

|                                           | Univariate      |         |
|-------------------------------------------|-----------------|---------|
|                                           | OR(95%CI)       | p-value |
| <b>Clinical characteristics</b>           |                 |         |
| Age (year)                                | 0.99(0.97-1.00) | 0.1     |
| Sex (male, %)                             | 1.10(0.74-1.62) | 0.6     |
| Smoking (yes, %)                          | 1.35(0.85-2.14) | 0.2     |
| Alcohol consumption (yes, %)              | 0.53(0.26-1.10) | 0.1     |
| Hypertension (yes, %)                     | 1.41(0.80-2.47) | 0.2     |
| Diabetes mellitus (yes, %)                | 1.55(1.03-2.30) | 0.03    |
| Heart disease (yes, %)                    | 1.20(0.73-1.95) | 0.4     |
| ACEI/ARB (yes, %)                         | 0.79(0.52-1.22) | 0.3     |
| Marital status (yes, %)                   | 0.91(0.57-1.44) | 0.7     |
| Currently working (yes, %)                | 1.21(0.79-1.86) | 0.4     |
| Independent finances (yes, %)             | 1.20(0.81-1.79) | 0.4     |
| Education (high school or above, %)       | 0.93(0.63-1.39) | 0.7     |
| Body mass index (kg/m <sup>2</sup> )      | 1.01(0.96-1.05) | 0.8     |
| Blood urea nitrogen (mg/dl)               | 1.01(0.99-1.01) | 0.3     |
| eGFR (ml/min/1.73m <sup>2</sup> )         | 0.99(0.98-0.99) | 0.02    |
| Log-formed glycated hemoglobin            | 1.11(0.91-1.35) | 0.3     |
| Hemoglobin (g/dl)                         | 0.87(0.79-0.96) | 0.008   |
| Albumin (g/dl)                            | 0.82(0.48-1.40) | 0.5     |
| Uric acid (mg/dl)                         | 1.05(0.93-1.19) | 0.4     |
| Cholesterol (mg/dl)                       | 1.00(0.99-1.01) | 0.3     |
| Log-formed triglyceride                   | 1.59(0.69-3.65) | 0.3     |
| Log-formed urine protein/creatinine ratio | 1.84(1.29-2.62) | 0.01    |
| Self-care behavior (per score)            | 0.97(0.95-0.99) | 0.001   |
| Disease knowledge (per score)             | 0.93(0.89-0.96) | <0.001  |

**Table S2.** The adjusted risks for rapid eGFR decline (eGFR decline more than 3ml/min/1.73m<sup>2</sup>/year) within one year prior to questionnaire examination in study patients according to self-care behavior and disease knowledge scores using forward analysis

|                                                                | Rapid eGFR decline           |         |
|----------------------------------------------------------------|------------------------------|---------|
|                                                                | Adjusted Odds ratio (95% CI) | p-value |
| <b>Self-care behavior (per score)</b>                          | 0.97(0.95-0.99)              | 0.003   |
| <b>Self-care behavior (Quartiles)</b>                          |                              |         |
| Quartile 1                                                     | Reference                    |         |
| Quartile 2                                                     | 0.74(0.43-1.28)              | 0.3     |
| Quartile 3                                                     | 0.57(0.33-0.98)              | 0.04    |
| Quartile 4                                                     | 0.42(0.30-0.77)              | 0.005   |
| <b>Disease knowledge (per score)</b>                           | 0.92(0.88-0.95)              | <0.001  |
| <b>Disease knowledge (Quartiles)</b>                           |                              |         |
| Quartile 1                                                     | Reference                    |         |
| Quartile 2                                                     | 0.73(0.41-1.29)              | 0.3     |
| Quartile 3                                                     | 0.48(0.27-0.83)              | 0.009   |
| Quartile 4                                                     | 0.32(0.17-0.59)              | <0.001  |
| <b>Low self-care score &amp; low disease knowledge score</b>   | Reference                    |         |
| <b>High self-care score &amp; low disease knowledge score</b>  | 0.76(0.43-1.33)              | 0.3     |
| <b>Low self-care score &amp; high disease knowledge score</b>  | 0.68(0.39-1.19)              | 0.2     |
| <b>High self-care score &amp; high disease knowledge score</b> | 0.33(0.19-0.58)              | <0.001  |

Forward analysis was adjusted for all variables in Table 1

Self-care score quartile cut at 59, 67 and 72.

Disease knowledge score quartile cut at 18, 22 and 25

Low self-care as less than median of self-care score; High self-care as above median of self-care score

Low disease knowledge as less than median of disease knowledge score; High disease knowledge as above median of disease knowledge score

**Table S3.** The adjusted risks for rapid eGFR decline (eGFR decline more than 3ml/min/1.73m<sup>2</sup>/year) within two years prior to questionnaire examination in study patients according to self-care behavior and disease knowledge scores

|                                                     | eGFR slope<br>ml/min/1.73m <sup>2</sup> /year | Portion of eGFR decline more<br>than 3ml/min/1.73m <sup>2</sup> /year | Rapid eGFR decline           |         |
|-----------------------------------------------------|-----------------------------------------------|-----------------------------------------------------------------------|------------------------------|---------|
|                                                     |                                               |                                                                       | Adjusted Odds ratio (95% CI) | p-value |
| <b>Self-care behavior (per score)</b>               | -2.0 (-4.3,0.0)                               | 167/454 (36.8)                                                        | 0.97(0.95-0.99)              | 0.005   |
| <b>Self-care behavior (Quartiles)</b>               |                                               |                                                                       |                              |         |
| Quartile 1                                          | -2.5(-5.3,-0.5)                               | 58/125 (46.4)                                                         | Reference                    |         |
| Quartile 2                                          | -2.0(-4.0,0.3)                                | 39/107 (36.4)                                                         | 0.73(0.42-1.27)              | 0.3     |
| Quartile 3                                          | -1.7(-4.3,0.3)                                | 42/126 (33.3)                                                         | 0.60(0.35-1.04)              | 0.1     |
| Quartile 4                                          | -2.0(-3.6,0.1)                                | 28/96 (29.2)                                                          | 0.47(0.26-0.85)              | 0.01    |
| <b>Disease knowledge (per score)</b>                | -1.8(-1.2,0.1)                                | 167/454 (36.8)                                                        | 0.95(0.91-0.98)              | 0.006   |
| <b>Disease knowledge (Quartiles)</b>                |                                               |                                                                       |                              |         |
| Quartile 1                                          | -2.2(-4.9,-0.0)                               | 61/138 (44.2)                                                         | Reference                    |         |
| Quartile 2                                          | -2.1(-4.4,0.3)                                | 31/90 (34.4)                                                          | 0.73(0.41-1.32)              | 0.3     |
| Quartile 3                                          | -1.9(-3.9,-0.1)                               | 44/120 (36.7)                                                         | 0.76(0.44-1.31)              | 0.3     |
| Quartile 4                                          | -1.6(-3.8,0.1)                                | 31/106 (29.2)                                                         | 0.43(0.23-0.79)              | 0.007   |
| Low self-care score & low disease knowledge score   | -2.3(-5.1,-0.3)                               | 59/133 (44.4)                                                         | Reference                    |         |
| High self-care score & low disease knowledge score  | -2.0(-4.5,0.7)                                | 33/95 (34.7)                                                          | 0.75(0.42-1.32)              | 0.3     |
| Low self-care score & high disease knowledge score  | -2.2(-4.3,-0.0)                               | 38/99 (38.4)                                                          | 0.85(0.48-1.50)              | 0.5     |
| High self-care score & high disease knowledge score | -1.6(-3.5,0.0)                                | 37/127 (29.1)                                                         | 0.48(0.28-0.83)              | 0.01    |

Adjusted for age, sex and all variables in Table 1 whose p-value were <0.05 (age, sex, diabetes mellitus, hemoglobin, baseline estimated glomerular filtration rate, and log-formed urine protein-creatinine ratio) in unadjusted model.

Self-care score quartile cut at 59, 67 and 72.

Disease knowledge score quartile cut at 18, 22 and 25

**Table S4.** The distribution of five subscales of self-care behavior in study patients stratified by the medians levels of self-care behavior and disease knowledge

| Self-care                    | Entire Cohort<br>N=454 | Low self-care score<br>& low disease<br>knowledge score<br>N=133 | High self-care score<br>& low disease<br>knowledge score<br>N=95 | Low self-care score &<br>high disease<br>knowledge score<br>N=99 | High self-care score<br>& high disease<br>knowledge score<br>N=127 | p-value |
|------------------------------|------------------------|------------------------------------------------------------------|------------------------------------------------------------------|------------------------------------------------------------------|--------------------------------------------------------------------|---------|
| Total scores                 | 64.1±9.7               | 55.3±7.0 <sup>#&amp;</sup>                                       | 71.6±3.9 <sup>*&amp;</sup>                                       | 58.0±6.7 <sup>*#</sup>                                           | 72.5±4.0 <sup>*&amp;</sup>                                         | <0.001  |
| Medication adherence         | 23.5±2.8               | 22.5±3.2 <sup>#</sup>                                            | 24.5±1.3 <sup>*&amp;</sup>                                       | 22.5±3.7 <sup>#</sup>                                            | 24.5±1.2 <sup>*&amp;</sup>                                         | <0.001  |
| Diet control                 | 14.6±3.5               | 12.0±3.0 <sup>#&amp;</sup>                                       | 16.6±2.5 <sup>*&amp;</sup>                                       | 12.9±2.8 <sup>*#</sup>                                           | 17.1±2.4 <sup>*&amp;</sup>                                         | <0.001  |
| Exercise                     | 10.0±4.2               | 6.4±3.2 <sup>#&amp;</sup>                                        | 13.4±2.1 <sup>*&amp;</sup>                                       | 7.8±3.4 <sup>*#</sup>                                            | 13.1±2.3 <sup>*&amp;</sup>                                         | <0.001  |
| Smoking behavior             | 9.1±2.1                | 8.8±2.3 <sup>#</sup>                                             | 9.7±1.0 <sup>*&amp;</sup>                                        | 8.2±2.9 <sup>#</sup>                                             | 9.5±1.5 <sup>*&amp;</sup>                                          | <0.001  |
| Blood pressure<br>monitoring | 6.8±2.6                | 5.7±2.5 <sup>#</sup>                                             | 7.3±2.6 <sup>*</sup>                                             | 6.4±2.5                                                          | 7.9±2.3 <sup>*&amp;</sup>                                          | <0.001  |

Data are expressed as number (percentage) for categorical variables and mean±SD

Low self-care as less than median of self-care score (67); High self-care as above median of self-care score (67)

Low disease knowledge as less than median of disease knowledge score (22); High disease knowledge as above median of disease knowledge score (22)

\**P* < 0.05 compared with low self-care score & low disease knowledge score; #*P* < 0.05 compared with high self-care score & low disease knowledge score; &*P* < 0.05 compared with low self-care score & high disease knowledge score

**Table S5.** Distributions of sex, age, and chronic kidney disease (CKD) stages between subjects with questionnaire measurement and those without questionnaire measurement

|             | <b>Cohort of CKD care<br/>program<br/>(n = 1405)</b> | <b>Questionnaire group<br/>(n = 470)</b> | <b>Non-questionnaire<br/>group<br/>(n = 935)</b> | <b>p-value</b> |
|-------------|------------------------------------------------------|------------------------------------------|--------------------------------------------------|----------------|
| Age (years) |                                                      |                                          |                                                  |                |
| < 60        | 24.8                                                 | 26.2                                     | 24.2                                             | 0.4            |
| ≥ 60        | 75.2                                                 | 73.8                                     | 75.8                                             |                |
| Sex         |                                                      |                                          |                                                  | 0.02           |
| male        | 60.1                                                 | 55.7                                     | 62.2                                             |                |
| Female      | 39.9                                                 | 44.3                                     | 37.8                                             |                |
| CKD stage   |                                                      |                                          |                                                  | 0.1            |
| 1-3a        | 25.0                                                 | 25.7                                     | 24.6                                             |                |
| 3b          | 24.1                                                 | 20.4                                     | 26.0                                             |                |
| 4           | 27.3                                                 | 28.3                                     | 26.8                                             |                |
| 5           | 23.6                                                 | 25.5                                     | 22.6                                             |                |

Stage 1: eGFR ≥ 90; stage 2: eGFR 60-89; stage 3a: eGFR 45-59; stage 3b: eGFR 30-44; stage 4: eGFR 15-29; stage 5: eGFR < 15 ml/min/1.73m<sup>2</sup>
